# Supplementary material for: Nurses’ Well-Being, Health-Promoting Lifestyle and Work Environment Satisfaction Correlation: A Psychometric Study for Development of Nursing Health and Job Satisfaction Model and Scale
Source: PubMed Central journal article supplement (PMC7277543; doi:10.3390/ijerph17103582), 2020-05-20
Supplement: ijerph-17-03582-s001.pdf [file ijerph-17-03582-s001.pdf]

**Table S1.** Nursing Health and Job Satisfaction (NHJS) Scale

| <b>Subscale</b>               | <b>Construct</b>           | <b>Item</b>                                                                                       |                                                                               |
|-------------------------------|----------------------------|---------------------------------------------------------------------------------------------------|-------------------------------------------------------------------------------|
| Well-being                    | Contentment                | I am currently satisfied with everything in my life.                                              |                                                                               |
|                               |                            | I enjoy my current lifestyle.                                                                     |                                                                               |
|                               |                            | I often feel that I am leading a better life than others.                                         |                                                                               |
|                               | Joyfulness                 | I am always smiling.                                                                              |                                                                               |
|                               |                            | I am optimistic about the future.                                                                 |                                                                               |
|                               |                            | I have lived a joyful life.                                                                       |                                                                               |
| Work environment Satisfaction | Benefits                   | Benefits package is acceptable.                                                                   |                                                                               |
|                               |                            | Night-shifts salary is reasonable.                                                                |                                                                               |
|                               |                            | The salary I receive is sufficient.                                                               |                                                                               |
|                               |                            | Paid holiday time is sufficient.                                                                  |                                                                               |
|                               | Support                    | The institution supports nurses' participation in academic conferences.                           |                                                                               |
|                               |                            | The counseling resources is satisfactory when I conduct academic studies.                         |                                                                               |
|                               |                            | I receive adequate and professional assistance when I encounter difficulties at work.             |                                                                               |
|                               | Respect                    | My job is respected by health professionals in the division.                                      |                                                                               |
|                               |                            | Division supervisors offer concern and assistance to me.                                          |                                                                               |
|                               | Security                   | My job is respected by the supervisors of the division.                                           |                                                                               |
|                               |                            | The accident reporting and prevention system in the institution is adequate.                      |                                                                               |
|                               |                            | Methods employed by the institution for managing dangerous items are safe and suitable.           |                                                                               |
|                               | Facilities                 | Regulations stipulated by the institution for managing sexual harassment incidents are efficient. |                                                                               |
|                               |                            | Efficiency of the institution in supplying consumable medical materials.                          |                                                                               |
|                               |                            | Sufficient medical equipment provided by the institution.                                         |                                                                               |
|                               | Health-promoting lifestyle | Activities                                                                                        | Essential safety equipment for infection control provided by the institution. |
|                               |                            |                                                                                                   | I perform stretching exercises at least three times per week.                 |
|                               |                            |                                                                                                   | I perform strenuous exercises at least three times per week.                  |
| Attitude                      |                            | I engage in leisure physical activities.                                                          |                                                                               |
|                               |                            | I am enthusiastic and optimistic about life.                                                      |                                                                               |
|                               |                            | I feel that I am developing myself in a positive direction.                                       |                                                                               |
| Companionship                 |                            | I fell self-confident.                                                                            |                                                                               |
|                               |                            | I am happy to maintain contact with those I am close to.                                          |                                                                               |
|                               |                            | I arrange suitable vacations and travel activities.                                               |                                                                               |
|                               |                            | I keep in contact with my family and/or love relationships.                                       |                                                                               |

**Table S2.** Measurement results for the Nursing Health and Job Satisfaction (NHJS) scale

| Subscale                                                                      | Construct                                                                                         | Item                                                                                    | Unstandardized estimate | Standard error | Standardized estimate | p value    |
|-------------------------------------------------------------------------------|---------------------------------------------------------------------------------------------------|-----------------------------------------------------------------------------------------|-------------------------|----------------|-----------------------|------------|
| Well-being<br>CR = 0.926<br>AVE = 0.679<br>$\alpha = 0.91$                    | Contentment<br>$\alpha = 0.872$                                                                   | I am currently satisfied with everything in my life.                                    | 1                       | ~              | 0.82                  |            |
|                                                                               |                                                                                                   | I enjoy my current lifestyle.                                                           | 1.27                    | 0.07           | 0.89                  | <0.001 *** |
|                                                                               |                                                                                                   | I often feel that I am leading a better life than others.                               | 1.12                    | 0.07           | 0.81                  | <0.001 *** |
|                                                                               | Joyfulness<br>$\alpha = 0.846$                                                                    | I am always smiling.                                                                    | 1.07                    | 0.08           | 0.79                  | <0.001 *** |
|                                                                               |                                                                                                   | I am optimistic about the future.                                                       | 1.17                    | 0.08           | 0.85                  | <0.001 *** |
|                                                                               |                                                                                                   | I have lived a joyful life.                                                             | 1                       | ~              | 0.78                  |            |
| Work environment satisfaction<br>CR = 0.951<br>AVE = 0.665<br>$\alpha = 0.91$ | Benefits<br>$\alpha = 0.889$                                                                      | Benefits package is acceptable.                                                         | 1                       | ~              | 0.92                  |            |
|                                                                               |                                                                                                   | Night-shifts salary is reasonable.                                                      | 0.89                    | 0.05           | 0.71                  | <0.001 *** |
|                                                                               |                                                                                                   | The salary I receive is sufficient.                                                     | 1.02                    | 0.04           | 0.91                  | <0.001 *** |
|                                                                               |                                                                                                   | Paid holiday time is sufficient.                                                        | 0.81                    | 0.06           | 0.70                  | <0.001 *** |
|                                                                               | Support<br>$\alpha = 0.837$                                                                       | Efficiency of the institution in supplying consumable medical materials.                | 1                       | ~              | 0.72                  |            |
|                                                                               |                                                                                                   | Sufficient medical equipment provided by the institution.                               | 1.04                    | 0.08           | 0.83                  | <0.001 *** |
| Health-promoting lifestyle<br>CR = 0.940<br>AVE = 0.643<br>$\alpha = 0.83$    | Respect<br>$\alpha = 0.839$                                                                       | Essential safety equipment for infection control provided by the institution.           | 1.08                    | 0.08           | 0.85                  | <0.001 *** |
|                                                                               |                                                                                                   | My job is respected by health professionals in the division.                            | 1                       | ~              | 0.80                  |            |
|                                                                               |                                                                                                   | Division supervisors offer concern and assistance to me.                                | 0.99                    | 0.07           | 0.71                  | <0.001 *** |
|                                                                               | Security<br>$\alpha = 0.868$                                                                      | My job is respected by the supervisors of the division.                                 | 1.10                    | 0.08           | 0.82                  | <0.001 *** |
|                                                                               |                                                                                                   | The accident reporting and prevention system in the institution is adequate.            | 1.11                    | 0.07           | 0.90                  | <0.001 *** |
|                                                                               |                                                                                                   | Methods employed by the institution for managing dangerous items are safe and suitable. | 0.82                    | 0.06           | 0.74                  | <0.001 *** |
| Facilities<br>$\alpha = 0.883$                                                | Regulations stipulated by the institution for managing sexual harassment incidents are efficient. | 1                                                                                       | ~                       | 0.85           |                       |            |
|                                                                               | Efficiency of the institution in supplying consumable medical materials.                          | 1                                                                                       | ~                       | 0.80           |                       |            |
|                                                                               | Items and numbers of medical equipment provided by the institution.                               | 1.04                                                                                    | 0.06                    | 0.89           | <0.001 ***            |            |
| Activities<br>$\alpha = 0.799$                                                | Attitude<br>$\alpha = 0.886$                                                                      | Essential safety equipment for infection control provided by the institution.           | 1.10                    | 0.07           | 0.86                  | <0.001 *** |
|                                                                               |                                                                                                   | I perform stretching exercises at least three times per week.                           | 1.04                    | 0.05           | 0.73                  | <0.001 *** |
|                                                                               |                                                                                                   | I perform strenuous exercises at least three times per week.                            | 0.96                    | ~              | 0.75                  |            |
|                                                                               | Companionship<br>$\alpha = 0.785$                                                                 | I engage in leisure physical activities.                                                | 1.00                    | 0.05           | 0.80                  | <0.001 *** |
|                                                                               |                                                                                                   | I am enthusiastic and optimistic about life.                                            | 1.01                    | ~              | 0.87                  |            |
|                                                                               |                                                                                                   | I feel that I am developing myself in a positive direction.                             | 1.00                    | 0.07           | 0.91                  | <0.001 *** |
| I fell self-confident.                                                        | I am happy to maintain contact with those I am close to.                                          | 0.87                                                                                    | 0.06                    | 0.78           | <0.001 ***            |            |
|                                                                               | I am close to my family and/or love relationships.                                                | 1.00                                                                                    | ~                       | 0.95           |                       |            |
|                                                                               | I arrange suitable vacations and travel activities.                                               | 0.58                                                                                    | 0.10                    | 0.49           | <0.001 ***            |            |
| I keep in contact with my family and/or love relationships.                   | 0.95                                                                                              | 0.12                                                                                    | 0.85                    | <0.001 ***     |                       |            |

\*\*\*: p-value < 0.01.
